# Supplementary material
Source: PubMed Central journal article supplement (PMC7186915)
Supplement: jamapediatr-174-697-s001.pdf [file jamapediatr-174-697-s001.pdf]

## Supplementary Online Content

Widome R, Berger AT, Iber C, et al. Association of delaying school start time with sleep duration, timing, and quality among adolescents. *JAMA Pediatr*. Published online April 27, 2020. doi:10.1001/jamapediatrics.2020.0344

**eFigure.** Participant Flow Chart

**eTable 1.** Baseline Demographic Characteristics of START Full Cohort and Actigraphy Substudy Participants

**eTable 2.** Self-reported Baseline Sleep Duration by Wave of Entry Into Actigraphy Substudy and Wave of Observation of Actigraphy

This supplementary material has been provided by the authors to give readers additional information about their work.

**eFigure. Participant Flow Chart**

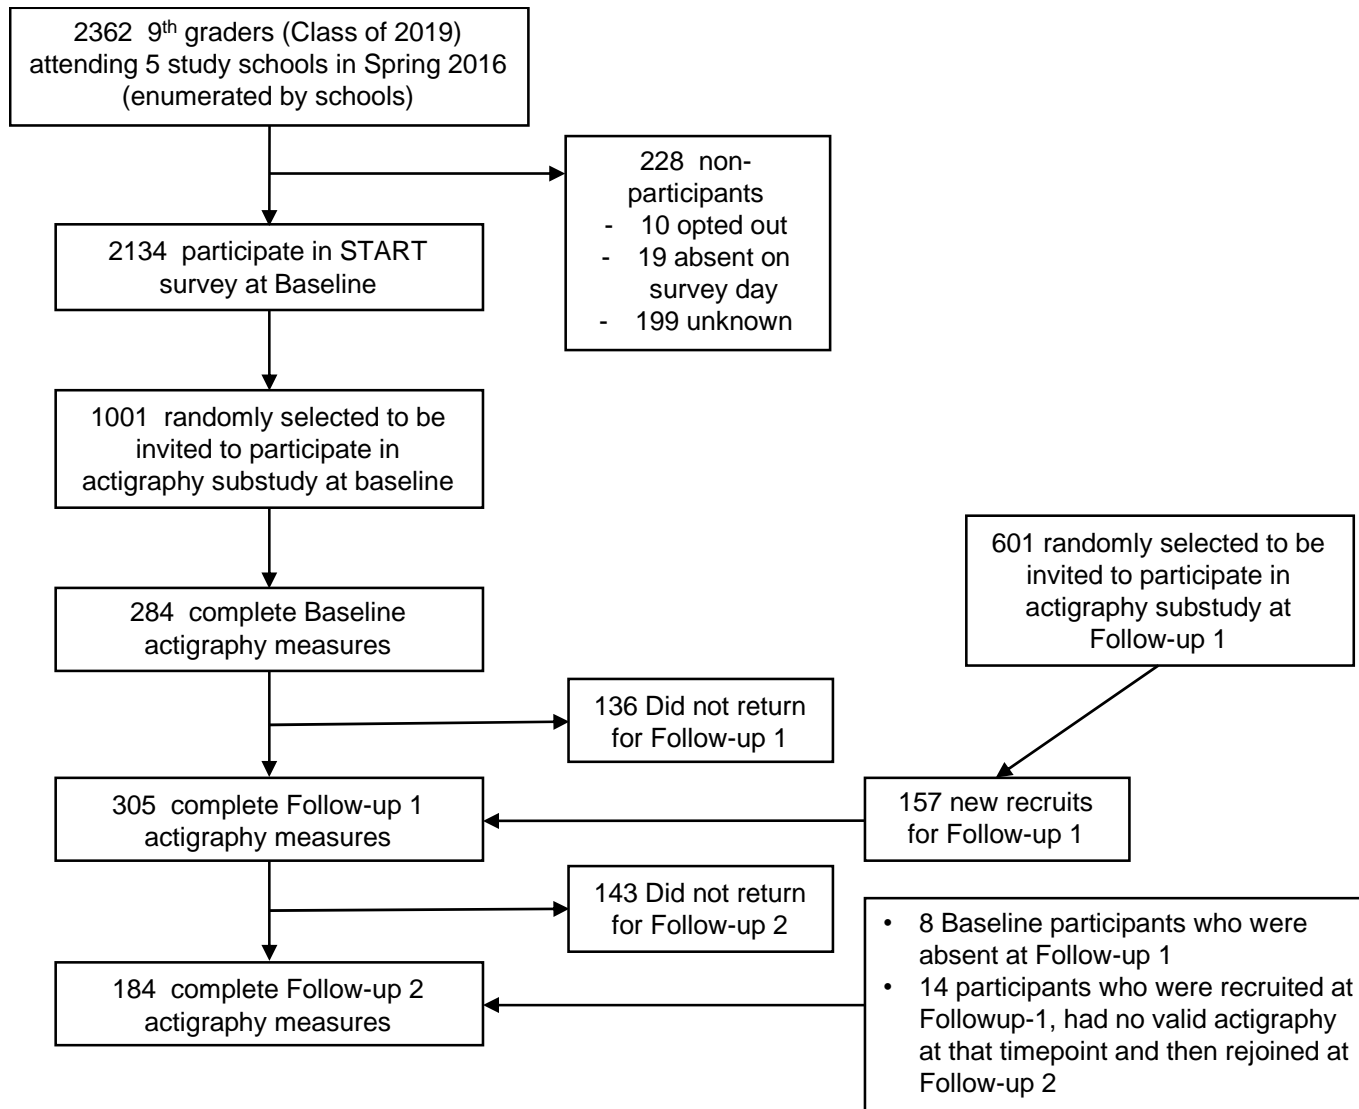

**eTable 1. Baseline Demographic Characteristics of START Full Cohort and Actigraphy Substudy Participants**

|                                                                     | START full cohort<br>No. (%) <sup>a</sup> | START substudy<br>No. (%) <sup>a</sup> |
|---------------------------------------------------------------------|-------------------------------------------|----------------------------------------|
| N                                                                   | 2422                                      | 455                                    |
| Policy change school                                                | 1414 (58.4)                               | 214 (47.0)                             |
| Biological sex <sup>a</sup>                                         |                                           |                                        |
| Female                                                              | 1224 (50.5)                               | 225 (49.5)                             |
| Male                                                                | 1165 (48.1)                               | 219 (48.1)                             |
| Prefer not to answer                                                | 25 (1.0)                                  | 7 (1.5)                                |
| Hispanic or Latino                                                  | 93 (3.8)                                  | 13 (2.9)                               |
| Race                                                                |                                           |                                        |
| Native American                                                     | 24 (1.0)                                  | 3 (0.7)                                |
| Asian                                                               | 154 (6.4)                                 | 20 (4.4)                               |
| Native Hawaiian/Pacific Islander                                    | 5 (0.2)                                   | 0 (0)                                  |
| Black                                                               | 94 (3.9)                                  | 7 (1.5)                                |
| White                                                               | 1914 (79.0)                               | 396 (87.0)                             |
| Multiracial                                                         | 153 (6.3)                                 | 21 (4.6)                               |
| Unknown/not reported                                                | 64 (2.6)                                  | 4 (0.9)                                |
| Receive free/reduced price lunch: Yes                               | 337 (13.9)                                | 30 (6.6)                               |
| Receive free/reduced price lunch: Don't know                        | 444 (18.3)                                | 78 (17.1)                              |
| 1+ parent completed college                                         | 1771 (73.1)                               | 370 (81.3)                             |
| START 2016-2018                                                     |                                           |                                        |
| <sup>a</sup> Categories do not add to 100% due to missing responses |                                           |                                        |

**eTable 2. Self-reported Baseline Sleep Duration by Wave of Entry Into Actigraphy Substudy and Wave of Observation of Actigraphy**

|                                  | Delayed-start adopting school |                     |                     | Comparison school   |                     |                     | Difference-in-Differences Analysis |         |                         |         |
|----------------------------------|-------------------------------|---------------------|---------------------|---------------------|---------------------|---------------------|------------------------------------|---------|-------------------------|---------|
|                                  | Baseline                      | Follow-up 1         | Follow-up 2         | Baseline            | Follow-up 1         | Follow-up 2         | Baseline to Follow-up 1            | P-value | Baseline to Follow-up 2 | P-value |
| Wave of entry <sup>a</sup>       | 7:26 (7:25 to 7:27)           | 7:30 (7:17 to 7:44) | 7:25 (7:09 to 7:41) | 7:26 (7:23 to 7:30) | 7:30 (7:22 to 7:38) | 7:37 (7:27 to 7:47) | 0:00 (-0:17 to 0:19)               | 0.93    | -0:11 (-0:31 to 0:08)   | 0.25    |
| N                                | 118                           | 77                  | 7                   | 147                 | 63                  | 6                   |                                    |         |                         |         |
| Wave of observation <sup>a</sup> | 7:26 (7:25 to 7:27)           | 7:27 (7:18 to 7:36) | 7:30 (7:21 to 7:38) | 7:28 (7:25 to 7:31) | 7:31 (7:27 to 7:36) | 7:34 (7:34 to 7:35) | -0:02 (-0:13 to 0:08)              | 0.68    | -0:02 (-0:13 to 0:07)   | 0.57    |
| N                                | 118                           | 131                 | 87                  | 147                 | 150                 | 87                  |                                    |         |                         |         |

START 2016-2018

Abbreviation: H:MM – Hours, Minutes.

<sup>a</sup> Unadjusted generalized estimating equation clustered at school level. Self-reported sleep durations were reported **at baseline** and compared by wave of entry into the substudy (participants' baseline sleep duration is entered once) and wave of observation in the substudy (participants' baseline sleep duration may be included multiple times).
